# Supplementary material
Source: PubMed Central journal article supplement (PMC4121859)
Supplement: NIHMS600188-supplement-1.pdf [file NIHMS600188-supplement-1.pdf]

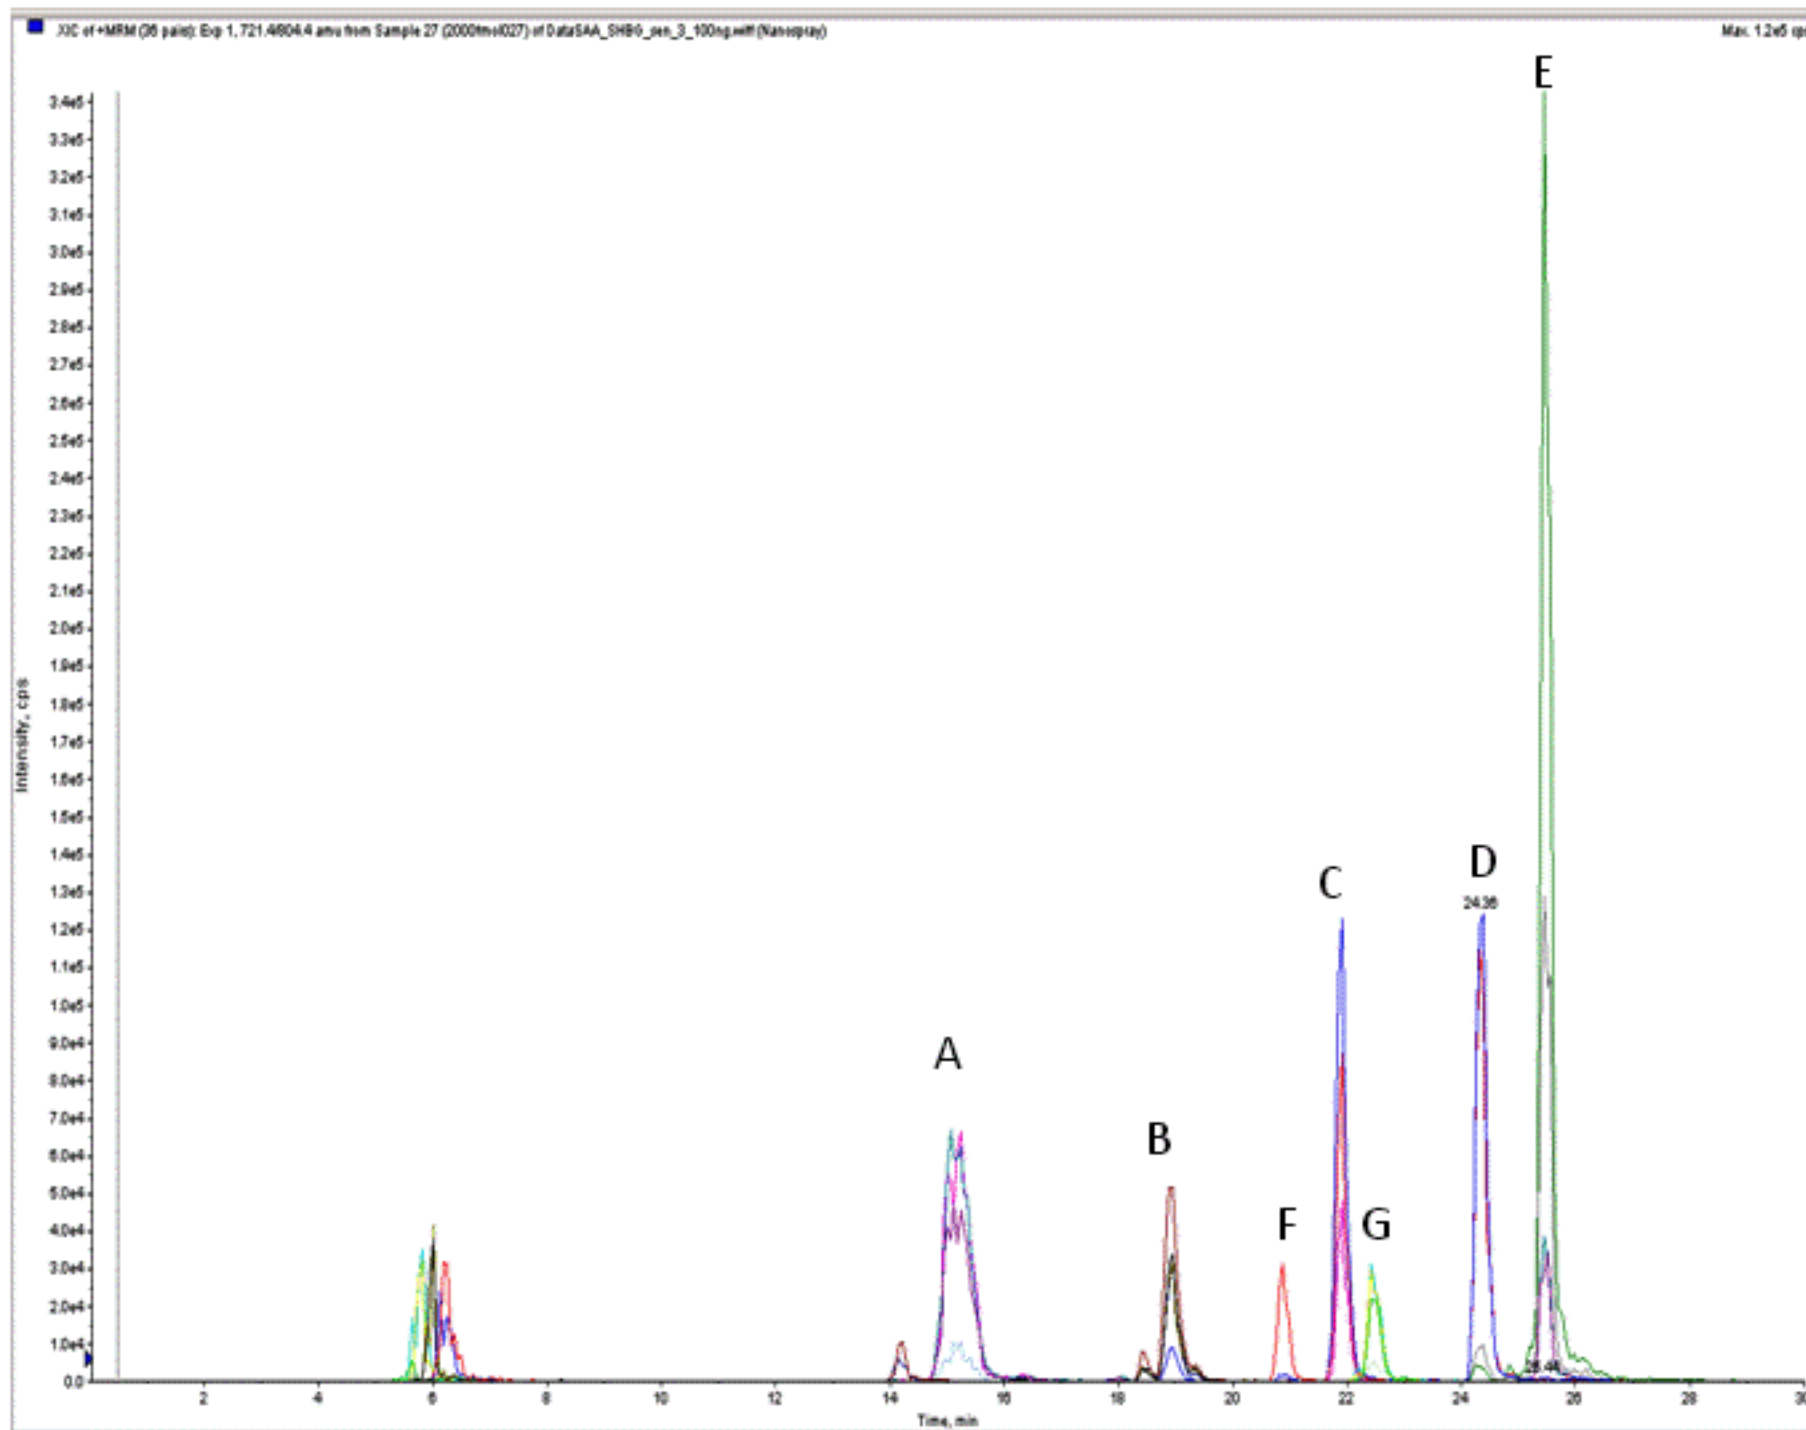

**Supplementary Figure 1:** Signature chromatographic pattern (XIC) of double transition peaks for peptide with double and triple charges. Normally, four transition peaks (two transitions \* two precursor states (2+ and 3+)) corresponding to one peptides will be observed for positive peptides, as in the cases of peak A-E. For false positive peptides, only one or two transitions peaks could be seen, as in the cases of peak F and G.

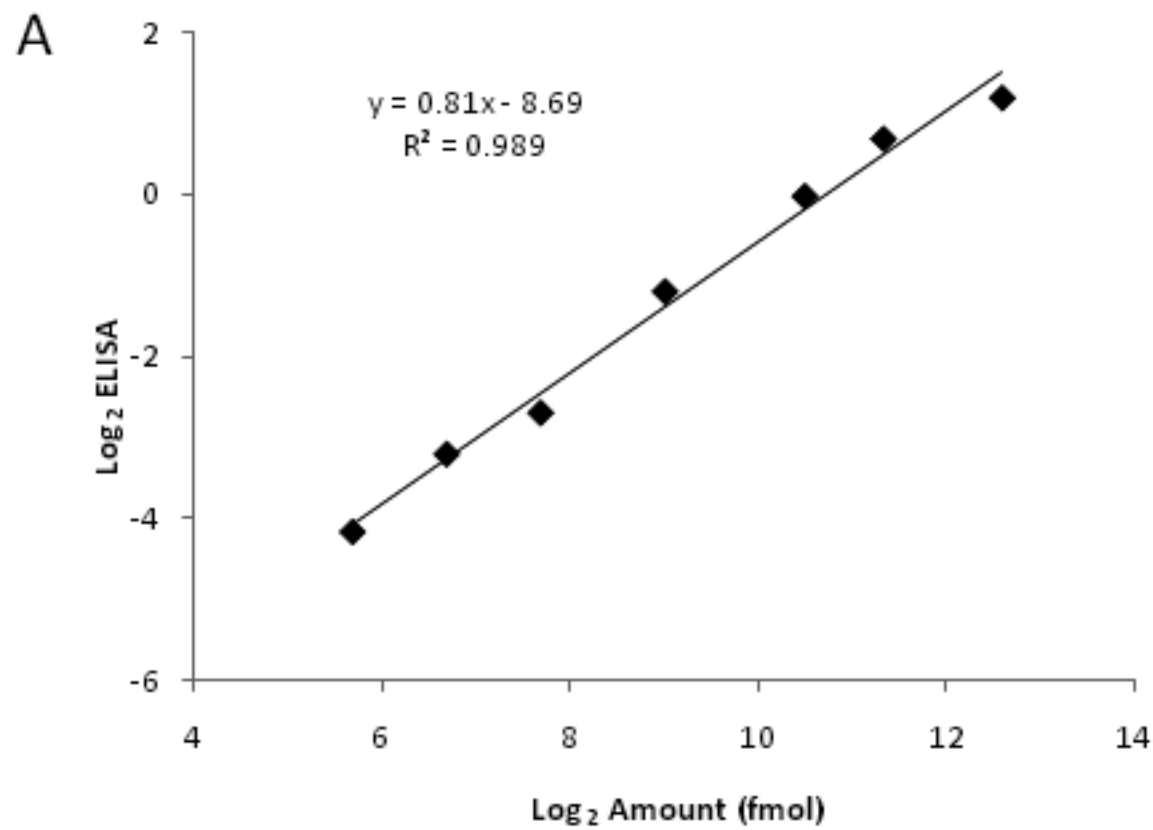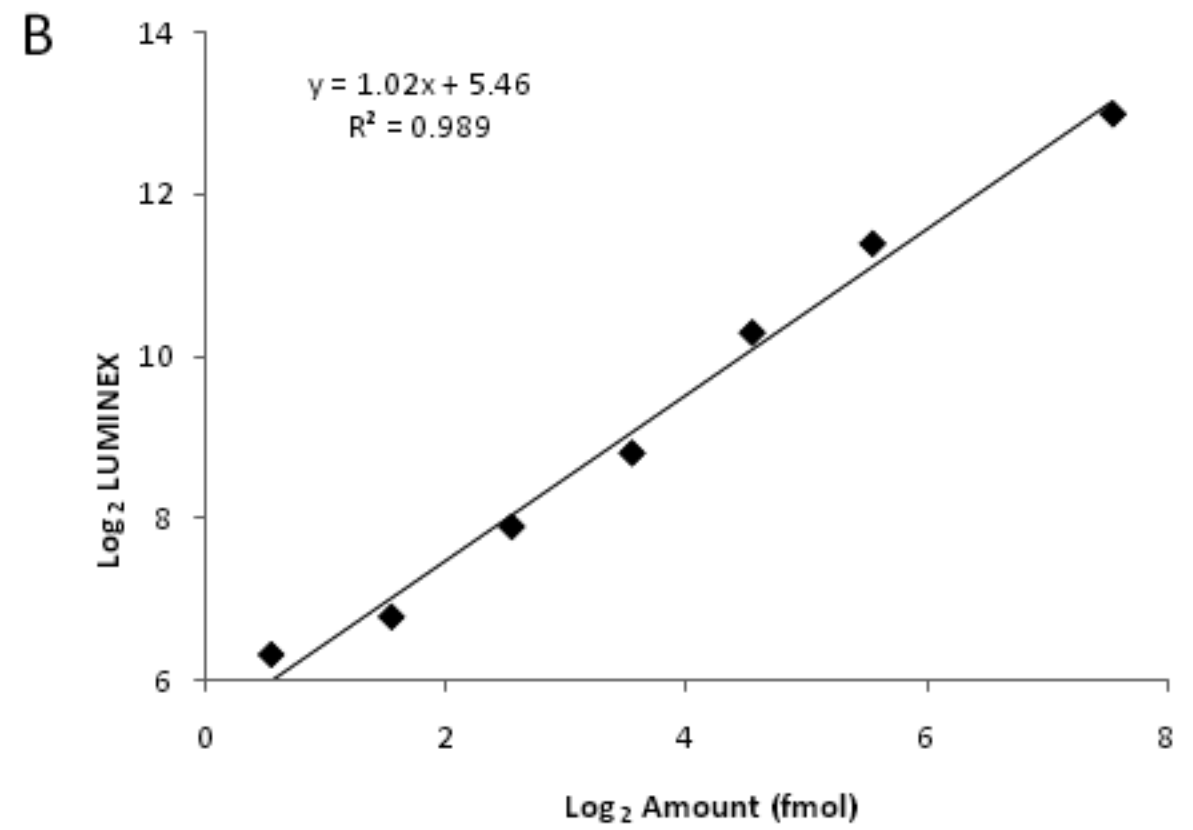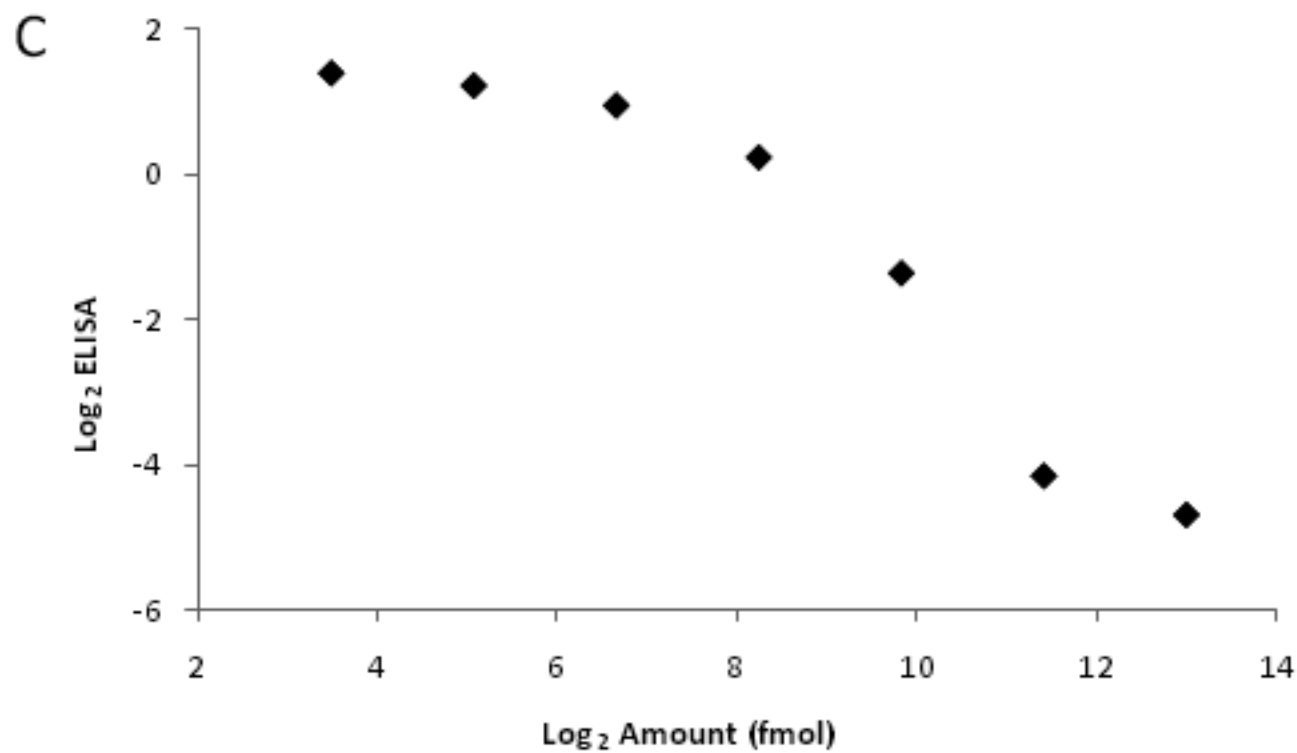

**Supplementary Figure 2:**  
Performance of ELISA/Luminex kits for SHBG (A), SAA1 (B) and CP (C). Results suggest that kits for SHBG and SAA1 are excellent while the ELISA kit for CP has a very narrow linear range.

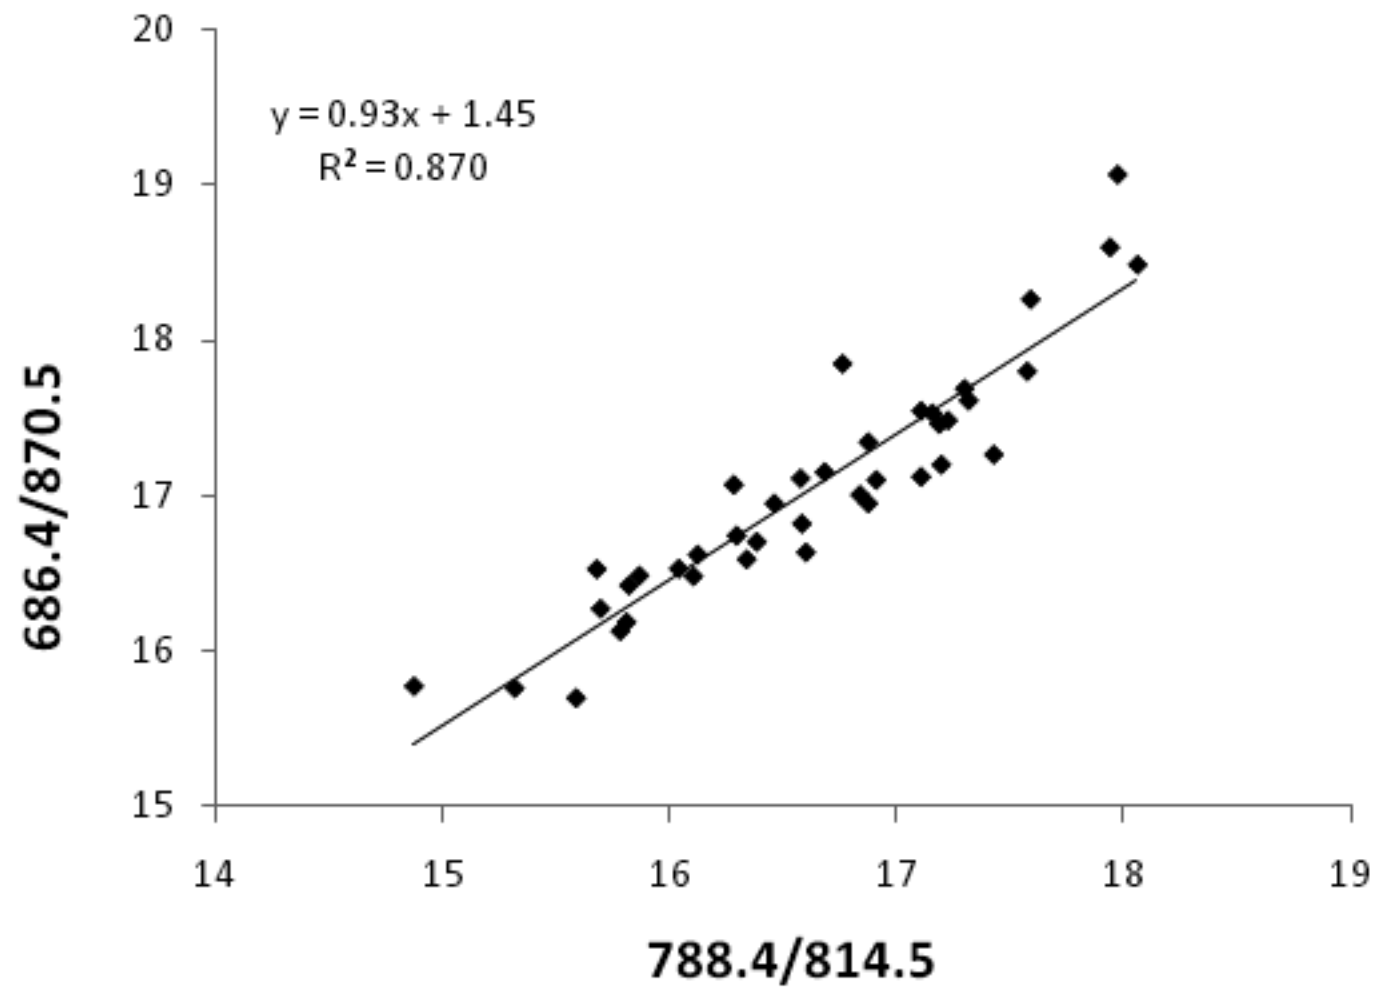

**Supplementary Figure 3:** Correlation between the two transitions derived from two different peptides of CP for neat serum samples from 20 individuals.

**Supplementary Table 1: Transitions selected for monitoring SAA1, SHBG and CP.**

| Protein | Peptide            | Charge | Transition   | Fragment ion | CE     |
|---------|--------------------|--------|--------------|--------------|--------|
| SAA1    | SFFSFLGEAFDGAR**   | 2+     | 775.9/822.4* | y8           | 43.793 |
|         |                    |        | 775.9/935.5  | y9           |        |
|         | GPGGVWAAEAISDAR    | 2+     | 728.9/832.5* | y8           | 41.443 |
|         |                    |        | 728.9/761.4  | y7           |        |
|         | GPGGVWAAEAISDAR    | 3+     | 486.2/632.3* | y6           | 24.395 |
|         |                    |        | 486.2/561.3  | y5           |        |
| SHBG    | TWDPEGVIFYGDTNPK   | 3+     | 613.6/631.3* | y6           | 29.999 |
|         |                    |        | 613.6/794.4  | y7           |        |
|         | TWDPEGVIFYGDTNPK** | 2+     | 919.9/941.4* | y8           | 50.996 |
|         |                    |        | 919.9/1054.5 | y9           |        |
|         | IALGGLLFPASNLR     | 2+     | 721.4/804.4* | y7           | 41.071 |
|         |                    |        | 721.4/917.5  | y8           |        |
|         | LPLVPALDGCLR       | 2+     | 662.4/733.4* | y6           | 38.119 |
|         |                    |        | 662.4/804.4  | y7           |        |
| CP      | ALYLQYTDETFR       | 2+     | 760.4/931.4* | y7           | 43.019 |
|         |                    |        | 760.4/768.3  | y6           |        |
|         | DIASGLIGPLILCK     | 2+     | 735.4/800.5* | y7           | 41.771 |
|         |                    |        | 735.4/743.4  | y6           |        |
|         | DLYSGLIGPLIVCR**   | 2+     | 788.4/814.5* | y7           | 44.421 |
|         |                    |        | 788.4/927.5  | y8           |        |
|         | GAYPLSIEPIGVR      | 2+     | 686.4/870.5* | y8           | 39.319 |
|         |                    |        | 686.4/783.5  | y7           |        |

\* Transition that has higher intensity and used to calculate peak area. \*\* Peptides analyzed for serum samples.
